# Supplementary material for: Genome-Wide Analyses and Functional Classification of Proline Repeat-Rich Proteins: Potential Role of eIF5A in Eukaryotic Evolution
Source: PLoS One. 2014 Nov 3;9(11):e111800. doi: 10.1371/journal.pone.0111800 (PMC4218817; doi:10.1371/journal.pone.0111800)
Supplement: Table S21 — 80 human genes encoding PPG at the frequency (>0.01). (XLSX) [file pone.0111800.s022.xlsx]

## Sheet: Sheet1
Gene	Protein names	Length	# of PPG	Freq of PPG
PHGR1	Proline, histidine and glycine-rich protein 1	82	5	0.0609756
COL4A5	Collagen alpha-5(IV) chain	1685	68	0.0403561
COL9A3	Collagen alpha-3(IX) chain	684	27	0.0394737
PRB2	Basic salivary proline-rich protein 2 (Salivary proline-rich protein) (Con1 glycoprotein) [Cleaved into: Basic proline-rich peptide IB-1; Basic proline-rich peptide P-E (IB-9); Basic proline-rich peptide IB-7; Basic proline-rich peptide IB-8c (Basic peptide P-F); Basic proline-rich peptide IB-4]	416	16	0.0384615
COL4A4	Collagen alpha-4(IV) chain	1690	59	0.0349112
COL9A2	Collagen alpha-2(IX) chain	689	24	0.0348331
COL8A2	Collagen alpha-2(VIII) chain (Endothelial collagen)	703	24	0.0341394
COL23A1	Collagen alpha-1(XXIII) chain	540	18	0.0333333
COL17A1	Collagen alpha-1(XVII) chain (180 kDa bullous pemphigoid antigen 2) (Bullous pemphigoid antigen 2) [Cleaved into: 120 kDa linear IgA disease antigen (120 kDa linear IgA dermatosis antigen) (Linear IgA disease antigen 1) (LAD-1); 97 kDa linear IgA disease antigen (97 kDa linear IgA bullous dermatosis antigen) (97 kDa LAD antigen) (97-LAD) (Linear IgA bullous disease antigen of 97 kDa) (LABD97)]	1497	48	0.0320641
COL1A1	Collagen alpha-1(I) chain (Alpha-1 type I collagen)	1464	46	0.0314208
COL13A1	Collagen alpha-1(XIII) chain (COLXIIIA1)	717	22	0.0306834
COL5A1	Collagen alpha-1(V) chain	1838	54	0.0293798
COL9A1	Collagen alpha-1(IX) chain	921	27	0.029316
SNRPB	Small nuclear ribonucleoprotein-associated proteins B and B' (snRNP-B) (Sm protein B/B') (Sm-B/B') (SmB/B')	240	7	0.0291667
COL10A1	Collagen alpha-1(X) chain	680	19	0.0279412
COL3A1	Collagen alpha-1(III) chain	1466	40	0.0272851
COL5A3	Collagen alpha-3(V) chain	1745	47	0.0269341
COL2A1	Collagen alpha-1(II) chain (Alpha-1 type II collagen) [Cleaved into: Collagen alpha-1(II) chain; Chondrocalcin]	1487	40	0.0268998
COL4A1	Collagen alpha-1(IV) chain [Cleaved into: Arresten]	1669	44	0.0263631
COL4A3	Collagen alpha-3(IV) chain (Goodpasture antigen) [Cleaved into: Tumstatin]	1670	44	0.0263473
COL16A1	Collagen alpha-1(XVI) chain	1604	42	0.0261845
COL11A1	Collagen alpha-1(XI) chain	1806	47	0.0260244
COL22A1	Collagen alpha-1(XXII) chain	1626	41	0.0252153
C1QL4	Complement C1q-like protein 4 (C1q and tumor necrosis factor-related protein 11) (C1q/TNF-related protein 11)	238	6	0.0252101
SNRPN	Small nuclear ribonucleoprotein-associated protein N (snRNP-N) (Sm protein D) (Sm-D) (Sm protein N) (Sm-N) (SmN) (Tissue-specific-splicing protein)	240	6	0.025
EMID1	EMI domain-containing protein 1 (Emilin and multimerin domain-containing protein 1) (Emu1)	441	11	0.0249433
COL8A1	Collagen alpha-1(VIII) chain (Endothelial collagen) [Cleaved into: Vastatin]	744	18	0.0241935
COL1A2	Collagen alpha-2(I) chain (Alpha-2 type I collagen)	1366	33	0.0241581
COL18A1	Collagen alpha-1(XVIII) chain [Cleaved into: Endostatin]	1754	42	0.0239453
COL11A2	Collagen alpha-2(XI) chain	1736	41	0.0236175
WBP11	WW domain-binding protein 11 (WBP-11) (Npw38-binding protein) (NpwBP) (SH3 domain-binding protein SNP70) (Splicing factor that interacts with PQBP-1 and PP1)	641	15	0.0234009
EDA	Ectodysplasin-A (Ectodermal dysplasia protein) (EDA protein) [Cleaved into: Ectodysplasin-A, membrane form; Ectodysplasin-A, secreted form]	391	9	0.0230179
COL25A1	Collagen alpha-1(XXV) chain (Alzheimer disease amyloid-associated protein) (AMY) (CLAC-P) [Cleaved into: Collagen-like Alzheimer amyloid plaque component (CLAC)]	654	15	0.0229358
COL19A1	Collagen alpha-1(XIX) chain (Collagen alpha-1(Y) chain)	1142	26	0.0227671
COL5A2	Collagen alpha-2(V) chain	1499	33	0.0220147
HN1L	Hematological and neurological expressed 1-like protein (HN1-like protein)	190	4	0.0210526
SSBP3	Single-stranded DNA-binding protein 3 (Sequence-specific single-stranded-DNA-binding protein)	388	8	0.0206186
PRR13	Proline-rich protein 13 (Taxane-resistance protein)	148	3	0.0202703
COL15A1	Collagen alpha-1(XV) chain [Cleaved into: Restin (Endostatin-XV) (Related to endostatin) (Restin-I); Restin-2 (Restin-II); Restin-3 (Restin-III); Restin-4 (Restin-IV)]	1388	28	0.0201729
CPSF6	Cleavage and polyadenylation specificity factor subunit 6 (Cleavage and polyadenylation specificity factor 68 kDa subunit) (CFIm68) (CPSF 68 kDa subunit) (Pre-mRNA cleavage factor Im 68 kDa subunit) (Protein HPBRII-4/7)	551	11	0.0199637
ESX1	Homeobox protein ESX1 (Extraembryonic, spermatogenesis, homeobox 1) [Cleaved into: Homeobox protein ESX1-N; Homeobox protein ESX1-C]	406	8	0.0197044
C1QL1	C1q-related factor (C1q and tumor necrosis factor-related protein 14) (C1q/TNF-related protein 14) (Complement component 1 Q subcomponent-like 1)	258	5	0.0193798
PRB4	Basic salivary proline-rich protein 4 (Salivary proline-rich protein Po) (Parotid o protein) (Salivary proline-rich protein II-1) [Cleaved into: Protein N1; Glycosylated protein A; Peptide P-D (Proline-rich peptide IB-5)]	310	6	0.0193548
SF3B4	Splicing factor 3B subunit 4 (Pre-mRNA-splicing factor SF3b 49 kDa subunit) (SF3b50) (Spliceosome-associated protein 49) (SAP 49)	424	8	0.0188679
COL4A2	Collagen alpha-2(IV) chain [Cleaved into: Canstatin]	1712	32	0.0186916
DAZAP2	DAZ-associated protein 2 (Deleted in azoospermia-associated protein 2)	168	3	0.0178571
C1QL2	Complement C1q-like protein 2 (C1q and tumor necrosis factor-related protein 10) (C1q/TNF-related protein 10)	287	5	0.0174216
KHSRP	Far upstream element-binding protein 2 (FUSE-binding protein 2) (KH type-splicing regulatory protein) (KSRP) (p75)	711	12	0.0168776
COL27A1	Collagen alpha-1(XXVII) chain	1860	31	0.0166667
SSBP2	Single-stranded DNA-binding protein 2 (Sequence-specific single-stranded-DNA-binding protein 2)	361	6	0.0166205
GLDN	Gliomedin	551	9	0.0163339
SFTPA1	Pulmonary surfactant-associated protein A1 (PSP-A) (PSPA) (SP-A) (SP-A1) (35 kDa pulmonary surfactant-associated protein) (Alveolar proteinosis protein) (Collectin-4)	248	4	0.016129
SFTPA2	Pulmonary surfactant-associated protein A2 (PSP-A) (PSPA) (SP-A) (SP-A2) (35 kDa pulmonary surfactant-associated protein) (Alveolar proteinosis protein) (Collectin-5)	248	4	0.016129
C1QL3	Complement C1q-like protein 3 (C1q and tumor necrosis factor-related protein 13) (C1q/TNF-related protein 13)	255	4	0.0156863
FBRS	Probable fibrosin-1	460	7	0.0152174
COL7A1	Collagen alpha-1(VII) chain (Long-chain collagen) (LC collagen)	2944	44	0.0149457
PSMF1	Proteasome inhibitor PI31 subunit (hPI31)	271	4	0.0147601
PLSCR2	Phospholipid scramblase 2 (PL scramblase 2) (Ca(2+)-dependent phospholipid scramblase 2)	224	3	0.0133929
COLQ	Acetylcholinesterase collagenic tail peptide (AChE Q subunit) (Acetylcholinesterase-associated collagen)	455	6	0.0131868
PRB1	Basic salivary proline-rich protein 1 (Salivary proline-rich protein) [Cleaved into: Proline-rich peptide II-2; Basic peptide IB-6; Peptide P-H]	392	5	0.0127551
COL4A6	Collagen alpha-6(IV) chain	1691	21	0.0124187
CCBE1	Collagen and calcium-binding EGF domain-containing protein 1 (Full of fluid protein homolog)	406	5	0.0123153
GNAS	Neuroendocrine secretory protein 55 (NESP55) [Cleaved into: LHAL tetrapeptide; GPIPIRRH peptide]	245	3	0.0122449
MAPK1IP1L	MAPK-interacting and spindle-stabilizing protein-like (Mitogen-activated protein kinase 1-interacting protein 1-like)	245	3	0.0122449
C1QTNF3	Complement C1q tumor necrosis factor-related protein 3 (Collagenous repeat-containing sequence 26 kDa protein) (CORS26) (Secretory protein CORS26)	246	3	0.0121951
COLEC12	Collectin-12 (Collectin placenta protein 1) (CL-P1) (hCL-P1) (Nurse cell scavenger receptor 2) (Scavenger receptor class A member 4) (Scavenger receptor with C-type lectin)	742	9	0.0121294
CMTM2	CKLF-like MARVEL transmembrane domain-containing protein 2 (Chemokine-like factor superfamily member 2)	248	3	0.0120968
C1QTNF8	Complement C1q tumor necrosis factor-related protein 8 (C1q/TNF-related protein 8) (CTRP8)	252	3	0.0119048
FAM132B	Protein FAM132B (Complement C1q tumor necrosis factor-related protein 15) (Myonectin)	354	4	0.0112994
COL24A1	Collagen alpha-1(XXIV) chain	1714	19	0.0110852
SF3A2	Splicing factor 3A subunit 2 (SF3a66) (Spliceosome-associated protein 62) (SAP 62)	464	5	0.0107759
FRAT1	Proto-oncogene FRAT1 (Frequently rearranged in advanced T-cell lymphomas 1) (FRAT-1)	279	3	0.0107527
LYL1	Protein lyl-1 (Class A basic helix-loop-helix protein 18) (bHLHa18) (Lymphoblastic leukemia-derived sequence 1)	280	3	0.0107143
SNRPA	U1 small nuclear ribonucleoprotein A (U1 snRNP A) (U1-A) (U1A)	282	3	0.0106383
TNFRSF14	Tumor necrosis factor receptor superfamily member 14 (Herpes virus entry mediator A) (Herpesvirus entry mediator A) (HveA) (Tumor necrosis factor receptor-like 2) (TR2) (CD antigen CD270)	283	3	0.0106007
C1QTNF2	Complement C1q tumor necrosis factor-related protein 2	285	3	0.0105263
SSBP4	Single-stranded DNA-binding protein 4	385	4	0.0103896
C1QTNF7	Complement C1q tumor necrosis factor-related protein 7	289	3	0.0103806
FAM84A	Protein FAM84A (Neurologic sensory protein 1) (NSE1)	292	3	0.010274
